# Supplementary material for: Comparison of Risk of Osteoporotic Fracture in Denosumab vs Alendronate Treatment Within 3 Years of Initiation
Source: PubMed Central journal article supplement (PMC6481596; doi:10.1001/jamanetworkopen.2019.2416), 2019-04-19
Supplement: jamanetwopen-2-e192416-s001.pdf [file jamanetwopen-2-e192416-s001.pdf]

## Supplementary Online Content

Pedersen AB, Heide-Jørgensen U, Sørensen HT, Prieto-Alhambra D, Ehrenstein

V. Comparison of risk of osteoporotic fracture in denosumab vs alendronate

treatment within 3 years of initiation. *JAMA Netw Open*. 2019;2(4):e192416.

doi:10.1001/jamanetworkopen.2019.2416

**eTable 1.** Rates and hazard ratios of the fracture outcomes in initiators of denosumab and alendronate, defining initiation by requiring 5 years' absence of osteoporosis treatment before the index date (sensitivity analysis)

**eTable 2.** Rates and hazard ratios of the fracture outcomes for denosumab and alendronate, with follow-up censored at discontinuation or switch

This supplementary material has been provided by the authors to give readers additional information about their work.

eTable 1. Rates and hazard ratios of the fracture outcomes in initiators of denosumab and alendronate, defining initiation by requiring 5 years' absence of osteoporosis treatment before the index date (sensitivity analysis).

| Analysis group | Cohort      | N      | Cases | PY <sup>a</sup> | Crude rate per 1,000 PY | Crude hazard       | IPTW <sup>b</sup> hazard |
|----------------|-------------|--------|-------|-----------------|-------------------------|--------------------|--------------------------|
|                |             |        |       |                 | (95% CI)                | ratio (95% CI)     | ratio (95% CI)           |
| Hip fracture   | Denosumab   | 3,703  | 148   | 12,829.6        | 11.5 (9.8 - 13.6)       | 1.12 (0.95 - 1.32) | 1.07 (0.88 - 1.30)       |
|                | Alendronate | 83,110 | 2,841 | 274,546.6       | 10.3 (10.0 - 10.7)      | Reference          | Reference                |
| Any fracture   | Denosumab   | 3,703  | 374   | 12,274.5        | 30.5 (27.5 - 33.7)      | 0.95 (0.86 - 1.05) | 0.93 (0.82 - 1.05)       |
|                | Alendronate | 83,110 | 8,409 | 262,158.1       | 32.1 (31.4 - 32.8)      | Reference          | Reference                |

<sup>a</sup> PY- person years. <sup>b</sup> IPTW - inverse probability of treatment weight.

eTable 2. Rates and hazard ratios of the fracture outcomes for denosumab and alendronate, with follow-up censored at discontinuation or switch.

| Analysis group | Cohort      | N      | Cases | PY        | Crude rate per 1,000 | Crude hazard ratio | IPTW hazard ratio  |
|----------------|-------------|--------|-------|-----------|----------------------|--------------------|--------------------|
|                |             |        |       |           | PY (95% CI)          | (95% CI)           | (95% CI)           |
| Hip fracture   | Denosumab   | 4,624  | 122   | 11,633.2  | 10.5 (8.7 - 12.5)    | 1.01 (0.84 - 1.22) | 0.88 (0.71 - 1.09) |
|                | Alendronate | 87,731 | 1,785 | 166,022.4 | 10.8 (10.3 - 11.3)   | Reference          | Reference          |
| Any fracture   | Denosumab   | 4,624  | 339   | 11,198.1  | 30.3 (27.1 - 33.7)   | 0.93 (0.83 - 1.03) | 0.85 (0.75 - 0.97) |
|                | Alendronate | 87,731 | 5,438 | 160,218.3 | 33.9 (33.0 - 34.9)   | Reference          | Reference          |

<sup>a</sup> PY- person years. <sup>b</sup> IPTW - inverse probability of treatment weight.
